# Supplementary material for: Engineering O-glycosylation in modified N-linked oligosaccharide (Man12GlcNAc2∼Man16GlcNAc2) Pichia pastoris strains
Source: Royal Society of Chemistry journal article supplement (doi:10.1039/c8ra08121b), 2019-01-01
Supplement: c8ra08121b1.pdf [file c8ra08121b1.pdf]

## Supplementary information for

### Engineering O-Glycosylation in modified N-linked oligosaccharides (Man<sub>12</sub>GlcNAc<sub>2</sub>~Man<sub>16</sub>GlcNAc<sub>2</sub>) *Pichia pastoris* strain

Siqiang Li<sup>1,2</sup>, Peng Sun<sup>1</sup>, Xin Gong<sup>1</sup>, Shaohong Chang<sup>1</sup>, Enzhong Li<sup>2</sup>, Yuanhong Xu<sup>2</sup>, Jun Wu<sup>1\*</sup>, Bo Liu<sup>1\*</sup>

(1. Beijing Institute of Biotechnology, Beijing 100071, China. 2. School of biological and food engineering, Huanghuai University, Zhumadian 463000, China;)

\* To whom correspondence should be addressed: Jun Wu, Fax: +86 10 63833521; E-mail: junwu1969@163.com, and Bo Liu, Fax: +86 10 63833521; E-mail: liubo7095173@163.com.

## TABLE OF CONTENT

|                            |      |
|----------------------------|------|
| Experimental section ..... | S2-3 |
| Table SI. ....             | S4   |
| Table SII. ....            | S5   |
| Figure. S1. ....           | S6   |
| Figure. S2. ....           | S7   |
| Figure. S3. ....           | S8   |
| Figure. S4. ....           | S9   |
| Figure. S5. ....           | S10  |
| Table SIII. ....           | S11  |
| Reference .....            | S12  |

## Experimental section

### Construction of *PMT1* insertional inactivation plasmid ( $\Delta pmt1$ -pYES2)

#### (1). Construction of pYES2-URA3-AOX1TT plasmid.

The DNA sequence of complete AOX1TT gene was derived from the pPIC9 sequence and employed to design primers (Table SII) used for polymerase chain reaction (PCR) amplifications. The primers were synthesized by Sangonbiotech. PCR were performed with a Biometra PCR Amplifier using 2.5 unit of LA Taq DNA polymerase, 10  $\mu\text{g mL}^{-1}$  of template DNA (pPIC9 plasmid), 0.4 mM of each deoxynucleotide triphosphate (dNTP), and 0.4  $\mu\text{M}$  of the corresponding synthetic nucleotide primer (AOX1TT-5 and AOX1TT-3). The amplified DNA fragments were digested with Mlu I, inserted in pYES2-URA3 plasmid linearized by the same restriction enzymes to form pYES2-URA3-AOX1TT, and subsequently transformed into the *E. coli* DH5 $\alpha$  competent cell. The transformants were selected on Luria-Bertani/Ampicillin (LB/Amp) plates (1% tryptone, 0.5% yeast extract, 1% sodium chloride, 1.5% agar and 0.01% Amp).

#### (2). Construction of $\Delta pmt1$ -pYES2 plasmid.

The DNA sequence of complete CYC1TT gene was derived from the pGE-GAP sequence and employed to design primers (Table S II) used for PCR amplifications. The primers were synthesized by Sangonbiotech. PCR were performed with a Biometra PCR Amplifier using 2.5 unit of LA Taq DNA polymerase, 10  $\mu\text{g mL}^{-1}$  of template DNA (pGE-GAP plasmid), 0.4 mM of dNTP, and 0.4  $\mu\text{M}$  of the corresponding synthetic nucleotide primer (CYC1TT-5 and CYC1TT-3).

Chromosomal DNA (1 mg  $\text{mL}^{-1}$ ) of *P. pastoris* was extracted from yeast strain GS115 with a yeast genomic DNA kit and used for PCR. The DNA sequence of *PMT1* gene (63-900 bp) was derived from Gene bank (*PMT1*: CCA38772.1) and employed to design primers (Table S II) used for PCR amplifications. The primers were synthesized by Sangonbiotech. PCR were performed with a Biometra PCR Amplifier using 2.5 unit of LA Taq DNA polymerase, 10  $\mu\text{g mL}^{-1}$  of template DNA, 0.4 mM of dNTP, and 0.4  $\mu\text{M}$  of the corresponding synthetic nucleotide primer (*pmt1*-in-5 and *pmt1*-in-3).

Overlapped PCR was performed to fusion of *PMT1* gene (63-900 bp) and CYC1TT, 100  $\mu\text{L}$  of reactions containing 2.5 unit of LA Taq DNA polymerase, 10  $\mu\text{g mL}^{-1}$  of *PMT1* gene (63-900 bp) and CYC1TT gene, 0.4 mM of dNTP, and 0.4  $\mu\text{M}$  of the corresponding synthetic nucleotide primer (*pmt1*-in-5 and CYC1TT-3). The amplified DNA fragments were digested with NsiI, inserted in pYES2-URA3-AOXTT plasmid linearized by the same restriction enzymes to form  $\Delta pmt1$ -pYES2 recombinant plasmids, and subsequently transformed into the *E. coli* DH5 $\alpha$  competent cell. The transformants were selected on LB/Amp plates.

### Construction of *PMT5* gene deletion plasmid ( $\Delta pmt5$ -pYES2)

The DNA sequence of complete *PMT5* gene was derived from Gene bank (SCV11822.1) and employed to design primers (Table S II) used for PCR amplifications. The primers were synthesized by Sangonbiotech. PCR were performed with a Biometra PCR Amplifier using 2.5 unit of LA Taq DNA polymerase, 10  $\mu\text{g mL}^{-1}$  of Chromosomal DNA, 0.4 mM of dNTP. For amplification of *PMT5* gene upstream and downstream, 0.4  $\mu\text{M}$  primers of *pmt5*-5' arm-5 and *pmt5*-5' arm-3, and *pmt5*-3' arm-5 and *pmt5*-3' arm-3 were added into PCR reactions,

respectively.

Overlapped PCR was performed to fusion of *PMT5* gene upstream and downstream, 100 µL of reactions containing 2.5 unit of LA Taq DNA polymerase, 10 µg mL<sup>-1</sup> of *PMT5* gene upstream and downstream, 0.4 mM of dNTP, and 0.4 µM of the corresponding synthetic nucleotide primer (*pmt5*-5' arm-5 and *pmt5*-3' arm-3). The amplified DNA fragments were digested with Mlu I, inserted in pYES2-URA3 plasmid linearized by the same restriction enzymes to form  $\Delta pmt5$ -pYES2 recombinant plasmids, and subsequently transformed into the *E. coli* DH5 $\alpha$  competent cell. The transformants were selected on LB/Amp plates.

#### **Expression and purification of Anti Her-2 antibody**

For construction of GJK15-HL ( $\Delta och1$ ,  $\Delta pmt5$ ), pPIC9-HL recombinant plasmids linearized by Sall, and then electrotransformed into GJK15 ( $\Delta och1$ ,  $\Delta pmt5$ ) competent cell, the transformants were selected on MD+UR plates (1.5% agar, 1% YNB, 1% glucose, 4×10<sup>-5</sup>% biotin, 0.1% uracil and 0.01% arginine).

For expression of anti Her-2 antibody, GJK01-HL ( $\Delta och1$ ), GJK11-HL ( $\Delta och1$ ,  $\Delta pmt1$ ), GJK15-HL ( $\Delta och1$ ,  $\Delta pmt5$ ) was incubated in 100 mL of YPD+U at 25 °C for 36 h, respectively, at which point culture was added into BMGY+U (2% tryptone, 1% yeast extract, 1% YNB, 0.1% uracil, 4×10<sup>-5</sup>% biotin, 1% glycerol and 100mM of PB, pH~6.0) at the final concentration of 5%. After incubation for 24 h, 0.5% methanol was added each 12 h, cell growth was continued for an additional 48 h (25 °C, 200 rpm), and then culture supernatant was collected by centrifugation (10 min, 8000 g/min).

Culture supernatant containing anti Her-2 antibodies from GJK01-HL ( $\Delta och1$ ), GJK11-HL ( $\Delta och1$ ,  $\Delta pmt1$ ) and GJK15-HL ( $\Delta och1$ ,  $\Delta pmt5$ ) were purified with a HiTrap rProtein A FF column, and eluted with citric acid buffer (500 mM, pH 3.0). Fractions containing anti Her-2 antibodies were adjusted pH to 9.0 by 1M of Tris-HCl. Sodium dodecyl sulfate polyacrylamide gel electrophoresis (SDS-PAGE) and Western blot (goat anti human IgG polyclonal antibody) were performed to confirm the purified proteins. Proteins concentrations were evaluated with a BCA protein quantitation kit, and the proteins were stored at -80 °C.

#### **Comparison of growth rate of GJK01-HL ( $\Delta och1$ ), GJK11-HL ( $\Delta och1$ , $\Delta pmt1$ ) and GJK15-HL ( $\Delta och1$ , $\Delta pmt5$ )**

A desired strain was incubated 5 days in 2.5 mL of YPD+U medium. After growth 5 days (25 °C, 200 rpm), the culture was diluted to OD<sub>580</sub> = 30, and then were 1:20 diluted with fresh BMGY+U medium typically to a total volume of 5 mL. The culture was collected and measured OD<sub>580</sub> at point of 24, 60, 96, 120, 144, 168 and 192 h, respectively.

**Table SI. Strains and plasmids**

| Strain /plasmid            | Relevant characteristics                                                                                                                                                                      | Source/reference |
|----------------------------|-----------------------------------------------------------------------------------------------------------------------------------------------------------------------------------------------|------------------|
| <b>Strains</b>             |                                                                                                                                                                                               |                  |
| GS115                      | <i>Pichia pastoris</i> parent strain ( $\Delta his4$ )                                                                                                                                        | Invitrogen       |
| GJK01                      | GS115 ( $\Delta och1$ , $\Delta his4$ , $\Delta arg4$ , $\Delta ura3$ )                                                                                                                       | [1]              |
| GJK01-HL                   | GJK01 strain with pPIC9-HL plasmid                                                                                                                                                            | [2]              |
| GJK11-HL                   | GJK01-HL ( $\Delta pmt1$ )                                                                                                                                                                    | This study       |
| GJK15                      | GJK01 ( $\Delta pmt5$ )                                                                                                                                                                       | This study       |
| GJK15-HL                   | GJK15 strain with pPIC9-HL plasmid                                                                                                                                                            | This study       |
| <i>E.coli</i> DH5 $\alpha$ | Host for plasmid reproduction                                                                                                                                                                 | Cwbiotech        |
| <b>Plasmids</b>            |                                                                                                                                                                                               |                  |
| pYES2-URA3                 | Yeast overexpression vector containing <i>ura3</i> gene for selection                                                                                                                         | [3]              |
| pYES2-URA3-AOX1TT          | pYES2-URA3 plasmid with AOX1TT to terminate URA3 expression.                                                                                                                                  | This study       |
| $\Delta pmt1$ -pYES2       | pYES2-URA3-AOX1TT plasmid with <i>pmt1</i> (31-900 bp) and CYC1TT fusion sequence.                                                                                                            | This study       |
| $\Delta pmt5$ -pYES2       | pYES2-URA3 plasmid with <i>pmt5</i> -5' arm and <i>pmt5</i> -3' arm fusion sequence.                                                                                                          | This study       |
| pGE-GAP                    | Yeast overexpression vector containing CYC1TT used as template for PCR amplification of CYC1TT.                                                                                               | This study       |
| pPIC9                      | Yeast overexpression vector containing <i>his4</i> gene for selection, and AOX1 promotor and $\alpha$ -factor for production of secreted protein, and AOX1TT for PCR amplification of CYC1TT. | Invitrogen       |
| pPIC9-HL                   | pPIC9 plasmid with antiHer-2 antibody genes.                                                                                                                                                  | [2]              |

**Table SII.** The primers used to clone and identify genes in this study.

| Name                   | Direction | Primer sequence (5'→3')                                                      |
|------------------------|-----------|------------------------------------------------------------------------------|
| AOX1TT-5               | Forward   | TCTACGCGTCCTTAGACATGACTGTTCTCAGT                                             |
| AOX1TT-3               | Reverse   | TCTACGCGTAAGCTTGCACAAACGAACTTC                                               |
| CYC1TT--5              | Forward   | GCTTTCTTAGTCGTCCCCACTCTGATCTAATGATAGT<br>TAATGACTAATAGATCATGTAATTAGTTATGTCA  |
| CYC1TT-3               | Reverse   | GCAAATTAAAGCCTTCGAGCGTC                                                      |
| <i>pmt1</i> -in-5      | Forward   | TCTATGCATTAATGATAGTTAATGACTAATAGAGTA<br>AAACAAGTCCTCAAGAGGT                  |
| <i>pmt1</i> -in-3      | Reverse   | TGACATAACTAATTACATGATCTATTAGTCATTAAC<br>TATCATTAGATCAGAGTGGGGACGACTAAGAAAAGC |
| <i>pmt1</i> -ORF-OUT-5 | Forward   | AAGACCCATGCCGAACACGAC                                                        |
| <i>pmt1</i> -ORF-OUT-3 | Reverse   | GCTCTGAGGCACCTTGGGTAA                                                        |
| <i>pmt5</i> -5' arm-5  | Forward   | TCTACGCGTGGGCAATGGAAACCCTGAAAC                                               |
| <i>pmt5</i> -5' arm-3  | Reverse   | ATTCTAGCTCAAGCCCTCTAGCGCCGCCATTTCC<br>ACCGCCGACTCATT                         |
| <i>pmt5</i> -3' arm-5  | Forward   | AATGAGTCGGCGGTGGAAATGGCGGCCGCTAAGAG<br>GGCTTGAGCTAGAAT                       |
| <i>pmt5</i> -3' arm-3  | Reverse   | AGAACGCGTCTTTAGCGAAACCACTGACCT                                               |
| <i>pmt5</i> -OUT-5     | Forward   | CCCGATTTGACACCAGACAGT                                                        |
| <i>pmt5</i> -OUT-3     | Reverse   | AAAGCCTGGTAATCACAAACC                                                        |
| <i>pmt5</i> -ORF-5     | Forward   | GAAGAAACCCGAAAGCCCTAA                                                        |
| <i>pmt5</i> -ORF-3     | Reverse   | ATACATGGCCGCTTTGAGTA                                                         |
| <i>pmt5</i> -ORF-OUT-5 | Forward   | GCCAGCCATATCAGATAACAC                                                        |
| <i>pmt5</i> -ORF-OUT-3 | Reverse   | TCTGAGGGAAGGTTGCCGTGT                                                        |

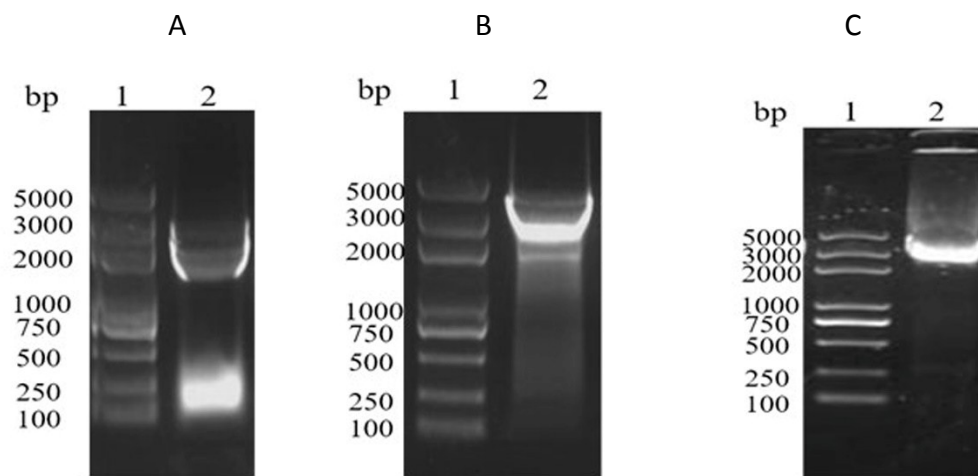

**Figure. S1.** PCR amplification of *pmt5* gene upstream (A, molecular marker, lane 1, *pmt5* gene upstream 1.7 kb, lane 2) and downstream flanking fragments (B, molecular marker, lane 1, *pmt5* gene downstream 2.1 kb, lane 2) and fusion of them (C, molecular marker, lane 1, fusion fragment 3.8 kb, lane 2).

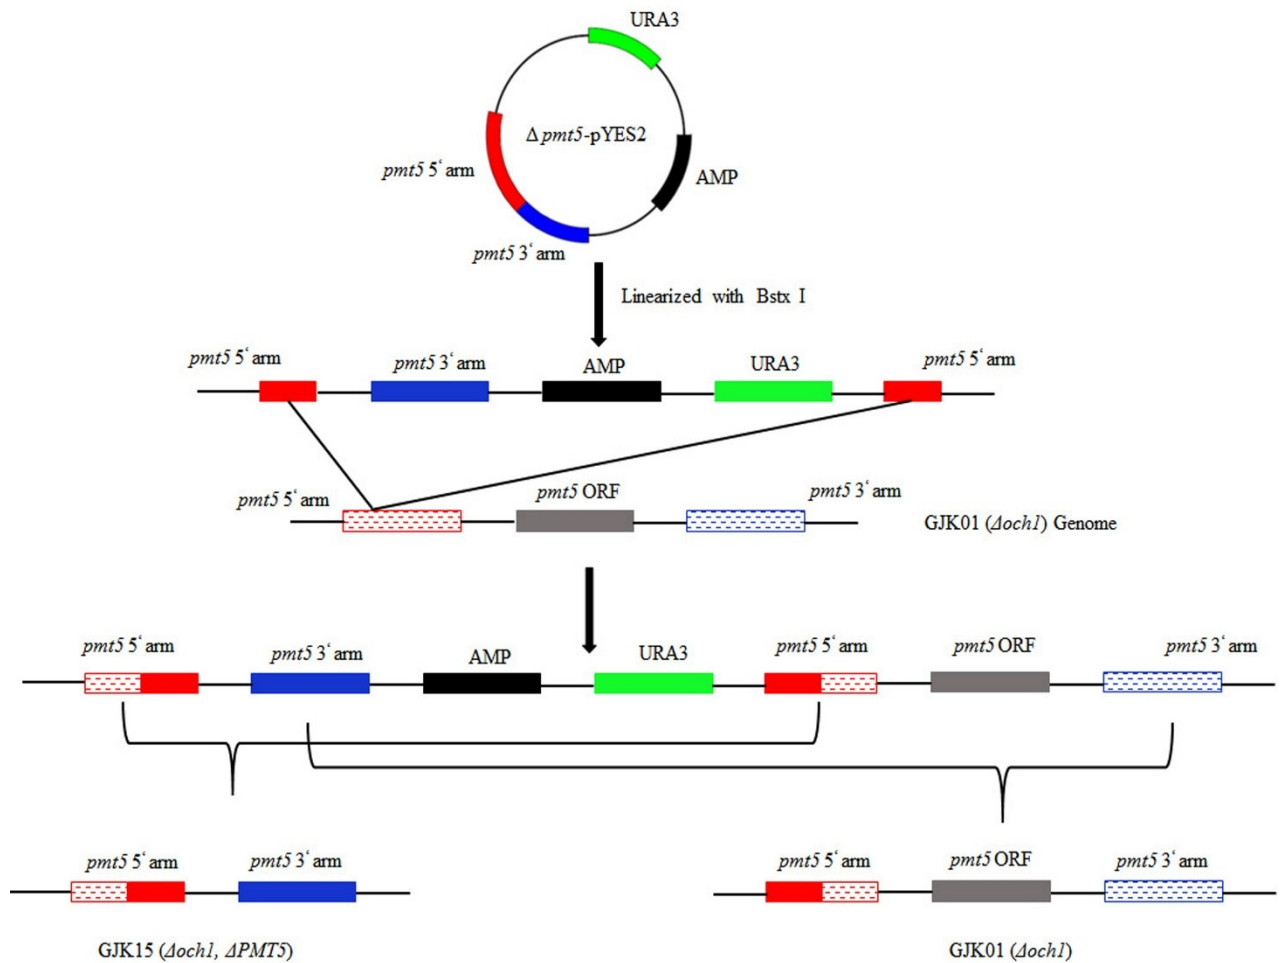

**Figure. S2.** *PMT5* gene knockout strategy-two-step homologous recombination. Upon digestion *PMT5* 5' flanking region (5' arm) of  $\Delta pmt5$ -pYES2 with *Bst*XI and transformation in *GJK01*( $\Delta och1$ ), the construct integrates at the *PMT5* 5' arm. The first recombinant that was selected on MD+RH plates. The second recombinant was selected on MD+URH containing 5-Fluoroorotic Acid, two equivalent type strains were created, the *PMT5* deletion strains *GJK15* ( $\Delta och1$ ,  $\Delta PMT5$ ) or wild-type strains *GJK01* ( $\Delta och1$ ).

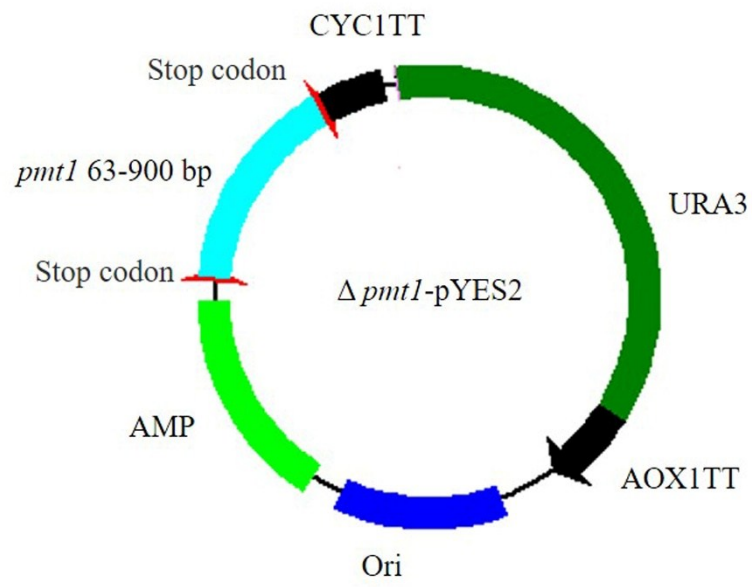

**Figure. S3.** Construction of  $\Delta pmt1$ -pYES2.

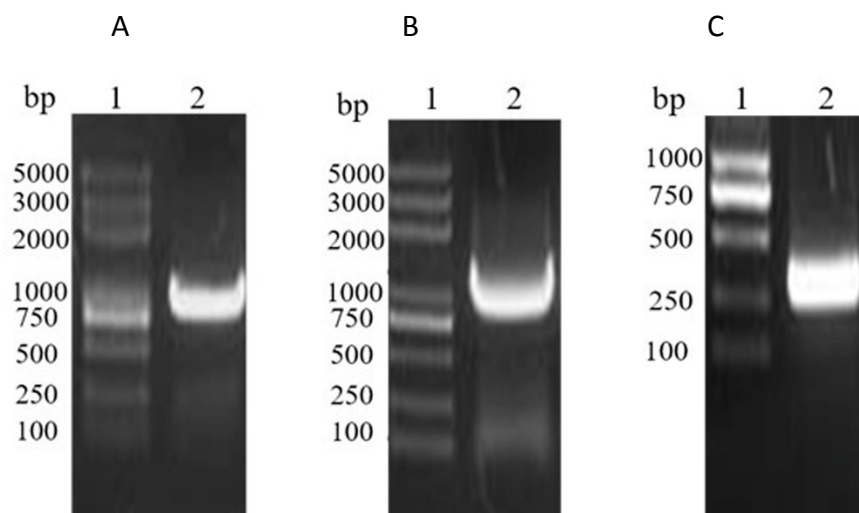

**Figure. S4.** PCR amplification of *pmt1* gene (A, molecular marker, lane 1, *pmt1* gene 837 bp, lane 2), CYC1TT (B, molecular marker, lane 1, CYC1TT 272 bp, lane 2) and fusion of them (C, molecular marker, lane 1, fusion of *pmt1* gene and CYC1TT 1.1 kb, lane 2).

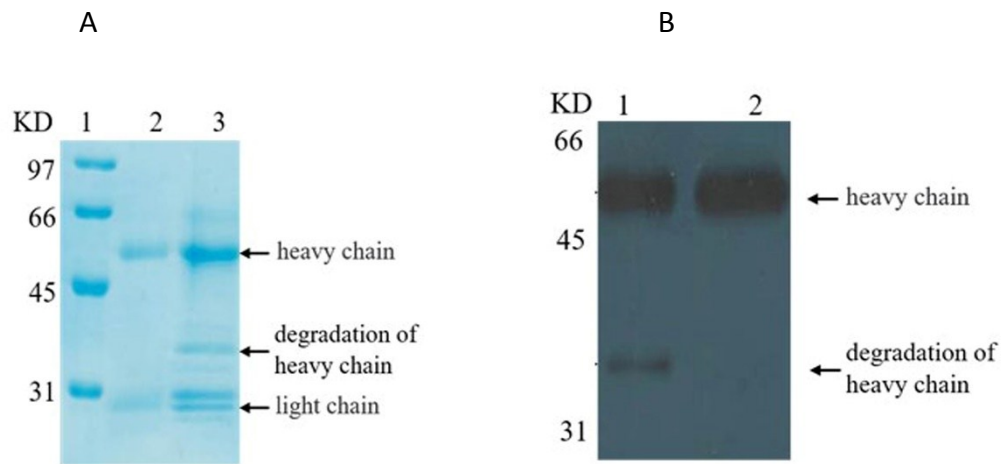

**Figure. S5.** (A) SDS-PAGE results of purified anti Her-2 antibody expressed by GJK15-HL ( $\Delta och1$ ,  $\Delta pmt5$ ) (lane 3), human IgG standard (lane 2) and molecular marker (lane 1); and (B) western blot results of purified anti Her-2 antibody expressed by GJK15-HL ( $\Delta och1$ ,  $\Delta pmt5$ ) (lane 1), human IgG standard (lane 2), stained with goat anti-human IgG Fc polyclonal antibody.

**Table SIII. Comparison of anti-Her-2 antibody O-glycans from GJK01-HL (*Δoch1*) and GJK11-HL (*Δoch1, Δpmt1*)**

| Proteins                                          | IOD               | IOD/human IgG standard |
|---------------------------------------------------|-------------------|------------------------|
| RNB (10μg)                                        | 54607.67±12872.61 | 1.09±0.06              |
| human IgG standard (10μg)                         | 49777.67±8840.56  | /                      |
| PNGase F+GJK01-HL ( <i>Δoch1</i> ) (10μg)         | 217706.9±22942.82 | 4.43±0.43              |
| GJK01-HL ( <i>Δoch1</i> ) (10μg)                  | 295924.2±41638.15 | 5.99±0.29              |
| PNGase F +GJK11-HL ( <i>Δoch1, Δpmt1</i> ) (20μg) | 154167.7±34839.09 | 3.09±0.34              |
| GJK11-HL ( <i>Δoch1, Δpmt1</i> ) (20μg)           | 184287.1±34693.48 | 3.70±0.14              |

## References:

- 1.Wang, Y., Gong, X., Chang, S., Liu, B., Song, M., Huang, H. and Wu, J., Chinese Journal of Biotechnology, 2007, 907-914.
- 2.Wang, L., Zhang, W. and Wu, J., Letters in biotechnehnology, 2008, 843-847.
- 3.Wang, L., Liu, B., Gong, X., Chang, S., Wang, L., Song, M., Xu, W. and Wu, J., China Biotechnology, 2009, 44-49.
